# Supplementary material for: Diversity of trypanosomes in humans and cattle in the HAT foci Mandoul and Maro, Southern Chad—A matter of concern for zoonotic potential?
Source: PubMed Central journal article supplement (PMC8224965; doi:10.1371/journal.pntd.0009323), 2021-06-09
Supplement: pntd.0009323.s007.pdf [file pntd.0009323.s007.pdf]

**S1 Table. Generic and specific primers used in the study.**

| Primer name       | <i>Trypanosoma sp.</i> | Nucleotide sequence (5'-3') | Amplicon size (bp) | Source                  |
|-------------------|------------------------|-----------------------------|--------------------|-------------------------|
| <b>ITS1-OutF</b>  | All trypanosomes       | TGCAATTATTGGTCGCGC          | 100-650            | (Adams et al., 2006)    |
| <b>ITS1-OutR</b>  |                        | CTTTGCTGCGTTCTT             | 100-650            |                         |
| <b>ITS1-InF</b>   |                        | TAGAGGAAGCAAAAG             | 100-650            |                         |
| <b>ITS1-InR</b>   |                        | AAGCCAAGTCATCCATCG          | 100-650            |                         |
| <b>gGAPDH-Out</b> | All trypanosomes       | TTY GCC GYA TYG GYC GCA TGG | 816                | (Hamilton et al., 2004) |
| <b>gGAPDH-Out</b> |                        | ACMAGRTCCACCACRCGGTG        |                    |                         |
| <b>gGAPDH-InR</b> |                        | GTT YTG CAG SGT CGC CTT GG  |                    |                         |
| <b>gGAPDH-InF</b> |                        | GCSTAYCAGATGAAGTACGAC       |                    | (Weber et al., 2019)    |
| <b>Tcon-outF</b>  | <i>T. congolense</i>   | TGTTGGTCGACACTGAGA          | 681-781            | (Ngomtcho et al., 2017) |
| <b>Tcon-outR</b>  |                        | TGCAATTATTGGTCGCGC          |                    |                         |
| <b>Tcon-inF</b>   |                        | TCGCGTGTCTCACGT             |                    |                         |
| <b>Tcon-inR</b>   |                        | TCAAAGATTGGGCAATGT          |                    |                         |

### Reference

- Adams, E.R., Malele, I.I., Msangi, A.R., Gibson, W.C., 2006. Trypanosome identification in wild tsetse populations in Tanzania using generic primers to amplify the ribosomal RNA ITS-1 region. *Acta Tropica* 100, 103–109. <https://doi.org/10.1016/j.actatropica.2006.10.002>
- Hamilton, P.B., Stevens, J.R., Gaunt, M.W., Gidley, J., Gibson, W.C., 2004. Trypanosomes are monophyletic: evidence from genes for glyceraldehyde phosphate dehydrogenase and small subunit ribosomal RNA. *International Journal for Parasitology* 34, 1393–1404. <https://doi.org/10.1016/j.ijpara.2004.08.011>
- Ngomtcho, S.C.H., Weber, J.S., Ngo Bum, E., Gbem, T.T., Kelm, S., Achukwi, M.D., 2017. Molecular screening of tsetse flies and cattle reveal different *Trypanosoma* species including *T. grayi* and *T. theileri* in northern Cameroon. *Parasites & Vectors* 10. <https://doi.org/10.1186/s13071-017-2540-7>
- Weber, J.S., Ngomtcho, S.C.H., Shaida, S.S., Chechet, G.D., Gbem, T.T., Nok, J.A., Mamman, M., Achukwi, D.M., Kelm, S., 2019. Genetic diversity of trypanosome species in tsetse flies (*Glossina* spp.) in Nigeria. *Parasites & Vectors* 12. <https://doi.org/10.1186/s13071-019-3718-y>
