# Supplementary material for: Diversity of trypanosomes in humans and cattle in the HAT foci Mandoul and Maro, Southern Chad—A matter of concern for zoonotic potential?
Source: PubMed Central journal article supplement (PMC8224965; doi:10.1371/journal.pntd.0009323), 2021-06-09
Supplement: pntd.0009323.s008.pdf [file pntd.0009323.s008.pdf]

**S2 Table. Selected villages in the Mandoul and Maro HAT foci for human blood samples collection.**

| <b>Focus</b>         | <b>Village</b>        | <b>Household</b> | <b>Registered</b> | <b>Blood collected</b> |
|----------------------|-----------------------|------------------|-------------------|------------------------|
| Mandoul              | Bembaïtada            | 6                | 62                | 52                     |
| Mandoul              | Konael                | 8                | 68                | 42                     |
| Mandoul              | Kobiteye              | 7                | 51                | 38                     |
| Mandoul              | Dedaye I              | 8                | 45                | 38                     |
| Mandoul              | Ferrick Sandana Lelou | 8                | 30                | 24                     |
| Mandoul              | Kousserie             | 13               | 48                | 32                     |
| Mandoul              | Palkoyo               | 14               | 50                | 34                     |
| Mandoul              | Berayan               | 18               | 55                | 46                     |
| <b>Total Mandoul</b> | <b>8</b>              | <b>82</b>        | <b>409</b>        | <b>306</b>             |
| Maro                 | Ngakorio              | 17               | 84                | 63                     |
| Maro                 | Ferrick Hanno         | 11               | 55                | 51                     |
| Maro                 | Kobdogué              | 14               | 57                | 54                     |
| Maro                 | Ngon-Molo             | 8                | 43                | 39                     |
| Maro                 | Beguiyon              | 11               | 35                | 30                     |
| Maro                 | Baguirgué             | 15               | 55                | 50                     |
| Maro                 | Aldjazira             | 24               | 73                | 70                     |
| Maro                 | Guirkyon (village)    | 19               | 59                | 35                     |
| Maro                 | Guirkyon (Army camp)  | -                | 19                | 19                     |
| <b>Total Maro</b>    | <b>9</b>              | <b>119</b>       | <b>480</b>        | <b>411</b>             |
| <b>Total</b>         | <b>17</b>             | <b>182</b>       | <b>889</b>        | <b>717</b>             |
