# Supplementary material for: Diversity of trypanosomes in humans and cattle in the HAT foci Mandoul and Maro, Southern Chad—A matter of concern for zoonotic potential?
Source: PubMed Central journal article supplement (PMC8224965; doi:10.1371/journal.pntd.0009323), 2021-06-09
Supplement: pntd.0009323.s009.pdf [file pntd.0009323.s009.pdf]

**S3 Table. Trypanosomes frequency in cattle according to villages and foci, and number of cattle sampled per village. Single, double and triple infections.**

| <i>Trypanosoma sp./Village</i>          | Maro _ Canton Maro |                  |                  |                  |                  |                  | Maro _ Canton Gourourou |                  |                  |                  |                  | Maro Total        | Mandoul          |
|-----------------------------------------|--------------------|------------------|------------------|------------------|------------------|------------------|-------------------------|------------------|------------------|------------------|------------------|-------------------|------------------|
|                                         | 1                  | 2                | 3                | 4                | 5                | 6                | 7                       | 8                | 9                | 10               | 11               |                   | 12               |
| <b>Single infection</b>                 |                    |                  |                  |                  |                  |                  |                         |                  |                  |                  |                  |                   |                  |
| <i>T. congolense</i>                    | 0                  | 0                | 0                | 13               | 1                | 3                | 0                       | 17               | 0                | 7                | 0                | 41 (8.9)          | 0                |
| <i>T. brucei ssp.</i>                   | 0                  | 0                | 0                | 0                | 0                | 0                | 0                       | 0                | 1                | 0                | 0                | 1 (0.2)           | 0                |
| <i>T. theileri</i>                      | 5                  | 2                | 2                | 1                | 1                | 2                | 1                       | 1                | 2                | 3                | 6                | 26 (5.6)          | 61 (78.2)        |
| <i>T. grayi</i>                         | 0                  | 0                | 1                | 0                | 0                | 0                | 0                       | 1                | 1                | 2                | 2                | 7 (1.5)           | 0                |
| <i>T. godfreyi</i>                      | 0                  | 0                | 0                | 2                | 0                | 0                | 0                       | 0                | 0                | 1                | 0                | 3 (0.6)           | 0                |
| <i>T. vivax</i>                         | 1                  | 2                | 0                | 4                | 0                | 15               | 5                       | 8                | 3                | 5                | 6                | 49 (10.6)         | 0                |
| <b>Total</b>                            | <b>6</b>           | <b>4</b>         | <b>3</b>         | <b>20</b>        | <b>2</b>         | <b>20</b>        | <b>6</b>                | <b>27</b>        | <b>7</b>         | <b>18</b>        | <b>14</b>        | <b>127 (27.4)</b> | <b>61 (78.2)</b> |
| <b>Double infections</b>                |                    |                  |                  |                  |                  |                  |                         |                  |                  |                  |                  |                   |                  |
| <i>T. godfreyi/T. vivax</i>             | 0                  | 0                | 0                | 0                | 0                | 0                | 0                       | 0                | 2                | 0                | 0                | 2 (0.4)           | 0                |
| <i>T. grayi/T. vivax</i>                | 0                  | 0                | 0                | 1                | 0                | 0                | 0                       | 0                | 1                | 0                | 0                | 2 (0.4)           | 0                |
| <i>T. theileri/T. godfreyi</i>          | 0                  | 0                | 0                | 0                | 0                | 0                | 0                       | 1                | 0                | 0                | 0                | 1 (0.2)           | 0                |
| <i>T. theileri/T. vivax</i>             | 0                  | 0                | 0                | 2                | 1                | 0                | 0                       | 0                | 0                | 0                | 2                | 5 (1.1)           | 0                |
| <i>T. simiae/T. vivax</i>               | 0                  | 0                | 0                | 0                | 0                | 0                | 0                       | 0                | 0                | 0                | 0                | 0 (0.0)           | 3 (3.8)          |
| <i>T. brucei/ T. vivax</i>              | 0                  | 0                | 0                | 0                | 0                | 0                | 0                       | 0                | 1                | 0                | 0                | 1 (0.2)           | 0                |
| <i>T. congolense/T. grayi</i>           | 0                  | 0                | 0                | 0                | 0                | 0                | 0                       | 0                | 0                | 1                | 0                | 1 (0.2)           | 0                |
| <i>T. congolense/T. theileri</i>        | 0                  | 0                | 0                | 1                | 0                | 0                | 0                       | 0                | 0                | 0                | 2                | 3 (0.6)           | 0                |
| <i>T. congolense/T. brucei</i>          | 0                  | 1                | 0                | 2                | 0                | 3                | 5                       | 1                | 1                | 2                | 1                | 16 (3.5)          | 0                |
| <b>Total</b>                            | <b>0</b>           | <b>1</b>         | <b>0</b>         | <b>6</b>         | <b>1</b>         | <b>8</b>         | <b>5</b>                | <b>2</b>         | <b>6</b>         | <b>4</b>         | <b>5</b>         | <b>21 (6.6)</b>   | <b>3 (3.8)</b>   |
| <b>Triple infections</b>                |                    |                  |                  |                  |                  |                  |                         |                  |                  |                  |                  |                   |                  |
| <i>T. congolense/T. brucei/T. vivax</i> | 0                  | 0                | 0                | 0                | 0                | 1                | 0                       | 0                | 0                | 0                | 0                | 1 (0.2)           | 0                |
| <b>Positive N (%)</b>                   | <b>6 (28.6)</b>    | <b>5 (25.0)</b>  | <b>3 (13.6)</b>  | <b>26 (37.7)</b> | <b>3 (5.2)</b>   | <b>24 (44.4)</b> | <b>11 (20.4)</b>        | <b>29 (49.1)</b> | <b>12 (44.4)</b> | <b>21 (37.5)</b> | <b>19 (86.4)</b> | <b>159 (34.4)</b> | <b>64 (82.1)</b> |
| <b>Negative N (%)</b>                   | <b>15 (71.4)</b>   | <b>15 (75.0)</b> | <b>19 (86.4)</b> | <b>43 (62.3)</b> | <b>55 (94.8)</b> | <b>30 (55.6)</b> | <b>43 (79.6)</b>        | <b>30 (50.9)</b> | <b>15 (55.6)</b> | <b>35 (62.5)</b> | <b>3 (13.6)</b>  | <b>303 (65.6)</b> | <b>14 (17.9)</b> |
| <b>Number of cattle</b>                 | <b>21</b>          | <b>20</b>        | <b>22</b>        | <b>69</b>        | <b>58</b>        | <b>54</b>        | <b>54</b>               | <b>59</b>        | <b>27</b>        | <b>56</b>        | <b>22</b>        | <b>462</b>        | <b>78</b>        |

Villages \_ 1 : Ngakorio (Sedentary) ; 2 : Ridina Al'Az (Semi-nomadic) ; 3 : Maingama (Refugee camp) ; 4 : Aldjazira1 (Semi-nomadic); 5 : Kobdogué (Sedentary); 6 : Aldjazira2 (Semi-nomadic); 7 : Aldjazira3 (Semi-nomadic); 8 : Gourourou (Sedentary); 9 : Guirkyon (Sedentary); 10 : Ngonkra1 (Nomadic); 11 : Ngonkra2 (Nomadic) ; 12 : Bembaitada (Sedentary).
