# Supplementary material for: Diversity of trypanosomes in humans and cattle in the HAT foci Mandoul and Maro, Southern Chad—A matter of concern for zoonotic potential?
Source: PubMed Central journal article supplement (PMC8224965; doi:10.1371/journal.pntd.0009323), 2021-06-09
Supplement: pntd.0009323.s010.pdf [file pntd.0009323.s010.pdf]

**S4 Table. Tsetse collection sites, surveys duration, number of traps used and tsetse caught.**

| Mandoul_Feb.-17 (4 days) |              |    | Maro_Feb.-17 (5 days) |             |    | Maro_Mar.-18 (7 days) |    | Maro_Jun.-18 (7 days) |    | Maro_Dec.-18 (10 days) |    |             |            |
|--------------------------|--------------|----|-----------------------|-------------|----|-----------------------|----|-----------------------|----|------------------------|----|-------------|------------|
| Site                     | Traps        | TN | Site                  | Traps       | TN | Traps                 | TN | Traps                 | TN | Traps                  | TN | Total flies | Taps       |
| Donombo3                 | 2            | 1  | Ngakorio              | 8           | 0  | 0                     | -  | -                     | -  | -                      | -  | 0           |            |
| Konael                   | 2            | 0  | Birya                 | 0           | -  | 24                    | 19 | -                     | -  | -                      | -  | 19          |            |
| Kobiteye                 | 6            | 0  | Kaba/Aldjazira        | 0           | -  | 8                     | 1  | 11                    | 3  | -                      | -  | 4           |            |
| Kousserie                | 2            | 0  | Maingama/Ridina       | 0           | -  | 7                     | 0  | -                     | -  | -                      | -  | 0           |            |
| Betoyo                   | 2            | 0  | Kobdogué              | 4           | 0  | 0                     | -  | -                     | -  | -                      | -  | 0           |            |
| Betel                    | 2            | 0  | Ferme-Taguinan        | 4           | 0  | 0                     | -  | -                     | -  | -                      | -  | 0           |            |
| Danko                    | 2            | 0  | Baguirgué             | 14          | 20 | 26                    | 36 | 11                    | 11 | 18                     | 86 | 153         |            |
| Djaribé                  | 2            | 0  | Guirkyon              | 0           | -  | 12                    | 0  | -                     | -  | -                      | -  | 0           |            |
| <b>Total</b>             | 20           | 1  | Total                 | 30          | 20 | 77                    | 56 | 22                    | 14 | 18                     | 86 | <b>176</b>  | <b>167</b> |
| Average tsetse catch     | <b>0.012</b> |    |                       | <b>0.13</b> |    | <b>0.10</b>           |    | <b>0.10</b>           |    | <b>0.47</b>            |    |             |            |

(-) Site not visited; TN: Tsetse number; Feb.-17: February 2017; Mar.-18: March 2018; Jun.-18: June 2018; Dec.-18: December 2018
