# Supplementary material for: Diversity of trypanosomes in humans and cattle in the HAT foci Mandoul and Maro, Southern Chad—A matter of concern for zoonotic potential?
Source: PubMed Central journal article supplement (PMC8224965; doi:10.1371/journal.pntd.0009323), 2021-06-09
Supplement: pntd.0009323.s011.pdf [file pntd.0009323.s011.pdf]

**S5 Table. Trypanosomes frequency in tsetse fly tissues. Description of single, double and triple infections.**

|                                                    | <b>Tsetse proboscis</b> | <b>Tsetse gut</b> | <b>Tsetse Remaining body</b> |
|----------------------------------------------------|-------------------------|-------------------|------------------------------|
| <b>Single infections</b>                           |                         |                   |                              |
| <i>T. vivax</i>                                    | 42                      | 14                | 59                           |
| <i>T. grayi</i>                                    | 0                       | 0                 | 5                            |
| <i>T. simiae</i>                                   | 0                       | 0                 | 1                            |
| <i>T. congolense</i>                               | 1                       | 1                 | 2                            |
| <i>Trypanosoma sp.-Maro1 (T. bennetti-like)</i>    | 0                       | 0                 | 1                            |
| <i>Trypanosoma sp.-Maro2</i>                       | 0                       | 1                 | 0                            |
| NI100 (not included in calculation)                | 12                      | 5                 | 11                           |
| <b>Total</b>                                       | <b>43</b>               | <b>16</b>         | <b>68</b>                    |
| <b>Double infections</b>                           |                         |                   |                              |
| <i>T. godfreyi/T. vivax</i>                        | 0                       | 0                 | 1                            |
| <i>T. grayi/T. vivax</i>                           | 5                       | 2                 | 10                           |
| <i>T. simiae/T. vivax</i>                          | 2                       | 0                 | 2                            |
| <i>T. brucei/T. vivax</i>                          | 2                       | 0                 | 5                            |
| <i>T. brucei/T. grayi</i>                          | 0                       | 1                 | 3                            |
| <i>T. congolense/T. vivax</i>                      | 2                       | 0                 | 1                            |
| <i>T. congolense/T. godfreyi</i>                   | 0                       | 1                 | 0                            |
| <b>Total</b>                                       | <b>11</b>               | <b>4</b>          | <b>22</b>                    |
| <b>Triple infections</b>                           |                         |                   |                              |
| <i>T. brucei/T. grayi/T. vivax</i>                 | 2                       | 0                 | 1                            |
| <i>T. congolense/T. brucei/T. vivax</i>            | 1                       | 0                 | 0                            |
| <i>T. brucei/T. grayi/T. godfreyi</i>              | 0                       | 0                 | 1                            |
| <i>T. grayi/T. godfreyi/N100</i>                   | 1                       | 0                 | 0                            |
| <i>Trypanosoma sp.-Maro1 /T. godfreyi/T. vivax</i> | 1                       | 0                 | 0                            |
| <b>Total</b>                                       | <b>5</b>                | <b>0</b>          | <b>2</b>                     |
| <b>Total PCR positive</b>                          | <b>59</b>               | <b>20</b>         | <b>92</b>                    |
| <b>Total PCR negative</b>                          | <b>112</b>              | <b>14</b>         | <b>51</b>                    |
| <b>Total collected samples</b>                     | <b>171</b>              | <b>34</b>         | <b>143</b>                   |

NI100: Unidentified amplicon (between 100 and 150 bp)
